# Supplementary material
Source: publisher figshare collection journal article supplement (https://karger.figshare.com/ndownloader/files/9787543)
Supplement: Supplementary file 1 [file 9787543]

**Supplementary Material: The set of 82 items that form the initial scale**

*Note*. Items marked with an asterisk were retained in the final 38-item instrument. Items are sorted in Schalock’s eight quality of life domains.

|  |  | **Globale Lebensqualität** |
| --- | --- | --- |
|  | 1 | Ich habe eine gute Lebensqualität |
|  |  | **Domain 1: Emotionales Wohlbefinden** |
| * | 2 | Ich fühle mich wohl |
|  | 3 | Ich bin im Allgemeinen mit mir selbst zufrieden |
|  | 4 | Ich kann mich an Kleinigkeiten erfreuen |
| * | 5 | Meine Stimmung ist oft gedrückt |
|  | 6 | Ich fühle mich emotional ausgeglichen |
| * | 7 | Mich belasten Gefühlsschwankungen |
| * | 8 | Ich fühle mich psychisch belastet (z.B. Depression, Angst) |
| * | 9 | Mein Leben ist anstrengend |
|  | 10 | Ich habe Freude am Leben |
|  | 11 | Ich fühle mich mit meinem jetzigen Substitutionsmittel wohl (z.B. nicht ‚eingewattet’) |
|  | 12 | Ich habe häufig Suchtdruck |
| * | 13 | Ich habe Konzentrationsschwierigkeiten |
| * | 14 | Ich fühle mich oft gestresst |
| * | 15 | Ich fühle mich unruhig |
|  | 16 | Ich kann mich gut entspannen |
|  | 17 | Ich habe Langeweile |
| * | 18 | Ich bin antriebslos und habe dadurch Schwierigkeiten, Dinge anzugehen |
|  | 19 | Ich bin selbstbewusst |
|  | 20 | Ich schäme mich für meine Sucht |
| * | 21 | Ich fühle mich minderwertig |
|  |  | **Domain 2: Persönliche Beziehungen** |
|  | 22 | Ich bin mit meinem sozialen Umfeld zufrieden |
|  | 23 | Ich fühle mich einsam |
|  | 24 | Ich habe genug Möglichkeiten, mich mit anderen über Probleme und Erfahrungen auszutauschen |
| * | 25 | Es gibt jemanden, mit dem ich überwiegend über andere Dinge als Drogen reden kann |
| * | 26 | Ich habe genug enge Bekannte |
| * | 27 | Ich habe einen wahren Freund/ eine wahre Freundin, dem/der ich vertraue |
| * | 28 | Es gibt jemanden, mit dem ich über alles reden kann |
| * | 29 | Es gibt jemanden, der mich auf emotionaler Ebene auffängt |
|  | 30 | Es gibt private Beziehungen, die mich belasten (z.B. Kinder, Familie, Partner) |
| * | 31 | Ich fühle mich von meinen Freunden oder engen Bekannten ausreichend unterstützt |
|  | 32 | Ich fühle mich von meiner Familie ausreichend unterstützt*(Wenn Sie keine Familie haben, die 0 ankreuzen)* |
|  |  | **Domain 3: Materielles Wohlbefinden** |
| * | 33 | Ich komme mit meinem Geld über die Runden |
|  | 34 | Ich habe genug Geld um mir kleine Dinge leisten zu können |
|  | 35 | Ich habe genug Geld, um am gesellschaftlichen Leben teilhaben zu können |
|  | 36 | Meine Beschaffungskriminalität belastet mich *(Wenn Sie nicht in der Beschaffungskriminalität sind, die 0 ankreuzen)* |
|  | 37 | Ich bin mit meiner beruflichen Situation zufrieden *(Wenn Sie keine Arbeit haben und mit Ihrer Situation sehr zufrieden sind, die 4 ankreuzen)* |
|  | 38 | Ich gehe einer sinnvollen Tätigkeit nach (z.B. Arbeit, Hobby, Sport, Haustier) |
| * | 39 | Meine Wohnsituation ist stabil |
| * | 40 | Ich fühle mich wohl in meiner Wohnung |
|  |  | **Domain 4: Persönliche Entwicklung** |
|  | 41 | Ich akzeptiere mich so, wie ich bin |
|  | 42 | Ich kann akzeptieren, dass die Sucht immer ein Teil meines Lebens sein wird |
|  | 43 | Mein Leben ist stabil und geregelt |
|  | 44 | Es ist schwierig für mich, mir meinen Alltag zu strukturieren |
|  | 45 | Ich möchte mehr gefördert werden |
| * | 46 | Ich glaube an meine Fähigkeit meine Ziele zu erreichen |
|  | 47 | Ich komme im Leben nicht voran |
| * | 48 | Ich bin zufrieden mit meiner persönlichen Entwicklung |
| * | 49 | Ich habe Erfolg im Leben |
|  |  | **Domain 5: Physisches Wohlbefinden** |
|  | 50 | Mein Gesundheitszustand belastet mich |
|  | 51 | Ich fühle mich körperlich fit |
|  | 52 | Ich habe Schlafprobleme |
|  | 53 | Mein aktuelles Gewicht belastet mich |
|  | 54 | Ich schwitze übermäßig |
| * | 55 | Ich bin zufrieden damit, wie ich den Alltag bewältige |
|  | 56 | Ich bin zufrieden damit, wie ich den Haushalt führe |
|  | 57 | Ich kann gut für mich selbst sorgen (z.B. Essen, gepflegt aussehen) |
| * | 58 | Ich bin zufrieden damit, wie ich meine freie Zeit nutze |
|  | 59 | Ich habe eine Freizeitbeschäftigung, die mir Freude macht |
|  |  | **Domain 6: Selbstbestimmung** |
|  | 60 | Ich führe ein selbstbestimmtes Leben |
|  | 61 | In meinem Leben dreht sich alles um die Substitution |
| * | 62 | Die Substitution ermöglicht es mir, mein Leben selbst zu gestalten |
| * | 63 | Die Substitution lässt sich gut in meinen Alltag integrieren |
|  | 64 | Ich fühle mich durch die Regeln und Verpflichtungen der Substitution in meinem Tagesablauf eingeschränkt |
| * | 65 | In der Substitutionsbehandlung wird auf meine individuellen Bedürfnisse und Wünsche eingegangen |
|  | 66 | Ich habe meinen Alkohol-/Drogenkonsum unter Kontrolle *(Wenn kein zusätzlicher Konsum vorhanden ist, die 4 ankreuzen)* |
|  | 67 | Ich habe Angst, meine selbstgesteckten Ziele nicht zu erreichen |
| * | 68 | Ich habe eine Zukunftsperspektive |
| * | 69 | Ich habe Hoffnung auf eine positive Zukunft |
|  | 70 | Es belastet mich, dass ich in letzter Zeit rückfällig geworden bin *(Wenn Sie keinen Rückfall hatten, die 0 ankreuzen)* |
|  | 71 | Ich habe Angst vor einem Rückfall |
|  |  | **Domain 7: Soziale Eingliederung** |
| * | 72 | Ich fühle mich in die Gesellschaft integriert |
| * | 73 | Ich nehme aktiv am gesellschaftlichen Leben teil |
| * | 74 | Ich bin zufrieden mit meiner medizinischen Versorgung in der Substitutionsbehandlung |
| * | 75 | Ich habe eine gute persönliche Beziehung zu meinem Arzt/ meiner Ärztin |
| * | 76 | Ich bin mit meiner psychosozialen Versorgung zufrieden |
|  | 77 | Ich brauche mehr professionelle Hilfe |
|  |  | **Domain 8: Rechte** |
|  | 78 | Ich habe gelernt, mit Vorurteilen gegenüber Süchtigen umzugehen |
| * | 79 | Es belastet mich, wenn Andere mich wegen meiner Abhängigkeit abwertend behandeln (z.B. Beamte, Apotheker, Klinikpersonal) |
| * | 80 | Als Abhängiger werde ich benachteiligt (z.B. Arbeit, Wohnung, Klinikum) |
| * | 81 | Wenn ich als Süchtige/r schlecht behandelt werde, leidet mein Selbstwertgefühl |
| * | 82 | Mir wird weniger Respekt entgegengebracht, weil ich abhängig bin |

**Supplementary Material: The Opioid Substitution Treatment Quality of Life scale (OSTQOL)**

Original in German

Instructions: Bitte lesen Sie jede Aussage durch und entscheiden Sie, wie sehr die Aussage auf Sie zutrifft.

Response options: 0 = trifft überhaupt nicht zu; 1 = trifft ein wenig zu; 2 = trifft ziemlich zu; 3 = trifft stark zu; 4 = trifft sehr stark zu.

|  | **Persönliche Entwicklung** |
| --- | --- |
| 1 | Ich habe Erfolg im Leben |
| 2 | Ich bin zufrieden mit meiner persönlichen Entwicklung |
| 3 | Ich nehme aktiv am gesellschaftlichen Leben teil |
| 4 | Ich habe Hoffnung auf eine positive Zukunft |
| 5 | Ich glaube an meine Fähigkeit meine Ziele zu erreichen |
| 6 | Ich bin zufrieden damit, wie ich den Alltag bewältige |
| 7 | Ich fühle mich wohl |
| 8 | Ich habe eine Zukunftsperspektive |
| 9 | Ich fühle mich in die Gesellschaft integriert |
| 10 | Ich bin zufrieden damit, wie ich meine freie Zeit nutze |
|  | **Psychisches Leiden** |
| 11 | Ich fühle mich unruhig |
| 12 | Ich fühle mich oft gestresst |
| 13 | Ich fühle mich psychisch belastet (z.B. Depression, Angst) |
| 14 | Meine Stimmung ist oft gedrückt |
| 15 | Mich belasten Gefühlsschwankungen |
| 16 | Ich habe Konzentrationsschwierigkeiten |
| 17 | Ich bin antriebslos und habe dadurch Schwierigkeiten, Dinge anzugehen |
| 18 | Mein Leben ist anstrengend |
| 19 | Ich fühle mich minderwertig |
|  | **Soziale Kontakte** |
| 20 | Es gibt jemanden, mit dem ich über alles reden kann |
| 21 | Ich habe einen wahren Freund/ eine wahre Freundin, dem/der ich vertraue |
| 22 | Es gibt jemanden, der mich auf emotionaler Ebene auffängt |
| 23 | Ich fühle mich von meinen Freunden oder engen Bekannten ausreichend unterstützt |
| 24 | Es gibt jemanden, mit dem ich überwiegend über andere Dinge als Drogen reden kann |
| 25 | Ich habe genug enge Bekannte |
|  | **Materielles Wohlbefinden** |
| 26 | Ich komme mit meinem Geld über die Runden |
| 27 | Meine Wohnsituation ist stabil |
| 28 | Ich fühle mich wohl in meiner Wohnung |
|  | **Opioidsubstitutionsbehandlung** |
| 29 | Die Substitution lässt sich gut in meinen Alltag integrieren |
| 30 | Ich bin zufrieden mit meiner medizinischen Versorgung in der Substitutionsbehandlung |
| 31 | Ich habe eine gute persönliche Beziehung zu meinem Arzt/ meiner Ärztin |
| 32 | Die Substitution ermöglicht es mir, mein Leben selbst zu gestalten |
| 33 | In der Substitutionsbehandlung wird auf meine individuellen Bedürfnisse und Wünsche eingegangen |
| 34 | Ich bin mit meiner psychosozialen Versorgung zufrieden |
|  | **Diskriminierung** |
| 35 | Mir wird weniger Respekt entgegengebracht, weil ich abhängig bin |
| 36 | Als Abhängiger werde ich benachteiligt (z.B. Arbeit, Wohnung, Klinikum) |
| 37 | Wenn ich als Süchtige/r schlecht behandelt werde, leidet mein Selbstwertgefühl |
| 38 | Es belastet mich, wenn Andere mich wegen meiner Abhängigkeit abwertend behandeln (z.B. Beamte, Apotheker, Klinikpersonal) |

**Supplementary Material: The Opioid Substitution Treatment Quality of Life scale (OSTQOL)**

English translation

Instructions: Please indicate how much each statement applies to you.

Response options: 0 = does not apply to me at all; 1 = applies to me a little; 2 = applies to me moderately; 3 = applies to me strongly; 4 = applies to me extremely.

|  | **Personal Development** |
| --- | --- |
| 1 | I am successful in life |
| 2 | I am satisfied with my personal development |
| 3 | I have an active social life |
| 4 | I have hope for a positive future |
| 5 | I believe in my ability to achieve my goals |
| 6 | I am satisfied with how I manage everyday life |
| 7 | I feel at ease |
| 8 | I have prospects for the future |
| 9 | I feel integrated into society |
| 10 | I am satisfied with how I use my free time |
|  | **Mental Distress** |
| 11 | I feel restless |
| 12 | I often feel stressed |
| 13 | I feel mentally distressed (e.g. depression, anxiety) |
| 14 | My mood is often low |
| 15 | I have mood swings |
| 16 | I have difficulties concentrating |
| 17 | I feel lethargic and have trouble tackling things |
| 18 | My life is exhausting |
| 19 | I feel inferior |
|  | **Social Contacts** |
| 20 | There is someone I can talk to about anything |
| 21 | I have a true friend who I trust |
| 22 | There is someone who supports me emotionally |
| 23 | I feel sufficiently supported by my friends and close acquaintances |
| 24 | There is someone I can talk to about things other than drugs |
| 25 | I have enough close acquaintances |
|  | **Material Wellbeing** |
| 26 | I am able to make ends meet |
| 27 | My living situation is stable |
| 28 | I feel comfortable in my home |
|  | **Opioid Substitution Treatment** |
| 29 | Opioid substitution treatment can be well integrated into my everyday life |
| 30 | I am satisfied with my medical care in opioid substitution treatment |
| 31 | I have a good personal relationship with my doctor |
| 32 | Opioid substitution treatment allows me to shape my own life |
| 33 | In opioid substitution treatment, my individual needs and desires are addressed |
| 34 | I am satisfied with my psychosocial care |
|  | **Discrimination** |
| 35 | I am treated with less respect because I am an addict |
| 36 | As an addict, I am disadvantaged (e.g. work, housing, hospital) |
| 37 | When I am treated poorly as an addict, my self-worth decreases |
| 38 | It weighs me down when others treat me poorly because of my addiction (e.g. officials, pharmacists, clinicians) |
